# Supplementary material for: Mechanism of Action of Cyanidin 3-O-Glucoside in Gluconeogenesis and Oxidative Stress-Induced Cancer Cell Senescence
Source: MDPI journal article supplement (doi:10.3390/antiox11040749), 2022-04-09
Supplement: s1 [file s1]

# Mechanism of action of cyanidin 3-O-glucoside in gluconeogenesis and oxidative stress-induced cancer cell senescence

Yaoyao Jia<sup>1,†</sup>, Chunyan Wu<sup>1,†</sup>, Adriana Rivera-Piza<sup>1,†</sup>, Yeon-Ji Kim<sup>1</sup>, Ji Hae Lee<sup>1</sup>, Sung-Joon Lee<sup>1,2,\*</sup>

<sup>1</sup> Department of Biotechnology, College of Life Science and Biotechnology, Korea University, Seoul 02841 Korea

<sup>2</sup> Department of Food Bioscience and Technology, College of Life Sciences and Biotechnology, Korea University, Seoul 02841 Republic of Korea

† These authors equally contributed to this study.

\* Correspondence: junelee@korea.ac.kr; Department of Biotechnology, College of Life Science and Biotechnology, Korea University, Seoul 02841 Korea; Department of Food Bioscience and Technology, College of Life Sciences and Biotechnology, Korea University, Seoul 02841 Republic of Korea; Tel.: +82-2-3290-302

## Supplementary materials

**Table S1.** List of chemical and/or reagents used for the present study.

| Chemical Reagents                         | Source                           | Catalogue # |
|-------------------------------------------|----------------------------------|-------------|
| Dulbecco's modified Eagle's medium (DMEM) | HyClone (Logan, UT, USA)         | SH30243.01  |
| Foetal bovine serum (FBS)                 | HyClone (Logan, UT, USA)         | SH30084.03  |
| Penicillin/streptomycin (PEST)            | Welgene Inc.                     | SV30010     |
| Cyanidin-3-O-glucoside (C3G)              | Tokiwa Phytochemical Co. (Japan) | P21021      |
| Troglitazone (TT)                         | Sigma Aldrich (St. Louis, MO)    | T2573       |
| GW7647                                    | Cayman Chemical (Michigan, USA)  | 10008613    |
| GW0742                                    | Cayman Chemical (Michigan, USA)  | 10006798    |
| 8-CPT-cAMP                                | Cayman Chemical (Michigan, USA)  | 12011       |
| Compound C                                | Sigma Aldrich (St. Louis, MO)    | 171260      |
| RNAiso Plus                               | Takara (Otsu, Japan)             | 9109        |
| Thunderbird™ SYBR® qPCR Mix               | Toyobo (Osaka, Japan)            | QPS-201     |
| Triglycerides                             | Cobas111 (Roche, Switzerland)    | 46577594    |
| Cholesterol                               | Cobas111 (Roche, Switzerland)    | 04718917    |
| Aspartate aminotransferase                | Cobas111 (Roche, Switzerland)    | 04657543    |
| Alanine aminotransferase                  | Cobas111 (Roche, Switzerland)    | 04718569    |
| HDL-cholesterol                           | Cobas111 (Roche, Switzerland)    | 07528604    |
| LDL-cholesterol                           | Cobas111 (Roche, Switzerland)    | 07005806    |
| Control siRNA                             | Santa Cruz (CA, USA)             | sc-37007    |
| Antibodies                                | Source                           | Catalogue # |
| PK4                                       | Santa Cruz (CA, USA)             | sc-14495    |
| PDH1α                                     | Abcam (Cambridge, UK)            | ab110330    |
| p-PDH1α                                   | Abcam (Cambridge, UK)            | ab92696     |
| AMPK                                      | Santa Cruz (CA, USA)             | sc-74461    |
| p-AMPK                                    | Santa Cruz (CA, USA)             | sc-33524    |
| PPARGC1                                   | Santa Cruz (CA, USA)             | sc-74504    |
| TP53                                      | Santa Cruz (CA, USA)             | sc-126      |
| SIRT1                                     | Santa Cruz (CA, USA)             | sc-74504    |
| CDKN1A                                    | Santa Cruz (CA, USA)             | sc-6246     |
| β-Actin                                   | Santa Cruz (CA, USA)             | sc-47778    |
| Secondary antibodies (anti-mouse)         | Santa Cruz (CA, USA)             | 31430       |
| Cell Lines                                | Source                           | Catalogue # |
| HepG2 (Human hepatocellular carcinoma)    | Korean Cell Line Bank            | 88065       |
| Mice                                      | Source                           | Catalogue # |

| C57BL/6J                 | Samtako Co. (Kyunggido, Korea) | C57BL/6JTacSam |
|--------------------------|--------------------------------|----------------|
| PPAR $\alpha$ -deficient | Taconic (Hudson, NY, USA)      | 1640           |
| Assay Kits               | Source                         | Catalogue #    |
| Adiponectin              | Abcam (Cambridge, UK)          | ab108785       |
| Insulin                  | Alpco (NH, USA)                | 80-INSMSU-E01  |
| Malonyl-CoA              | Cusabio Biotech Co. (TX, USA)  | CSB-E12896m    |
| $\beta$ -Hydroxybutyrate | Cayman (MI, USA)               | 700190         |
| LanthaScreen™ TR-FRET    | Invitrogen (Carlsbad, CA, USA) | A15878         |
| FGF21                    | Merck Millipore                | EZRMFGF21-26K  |
| Glycogen                 | Abcam (Cambridge, UK)          | ab169558       |

**Table S2.** Major liver metabolites from mice fed a HFD and C3G for 8 weeks using CE-MS and GC-TOF-MS.

| Metabolites                      | CE-MS relative peak area (mean $\pm$ SD) <sup>1</sup> |                         |
|----------------------------------|-------------------------------------------------------|-------------------------|
|                                  | HFD <sup>2</sup>                                      | C3G <sup>3</sup>        |
| <i>Purine metabolism</i>         |                                                       |                         |
| ATP                              | 14.201 $\pm$ 0.661                                    | 11.847 $\pm$ 0.414*     |
| ADP                              | 11.182 $\pm$ 0.329                                    | 10.728 $\pm$ 0.201      |
| AMP                              | 12.594 $\pm$ 0.443                                    | 17.245 $\pm$ 0.905*     |
| Adenine                          | 6.315 $\pm$ 0.508                                     | 8.433 $\pm$ 0.325*      |
| Adenosine                        | 3.470 $\pm$ 0.278                                     | 3.038 $\pm$ 0.030       |
| <i>Glycolysis</i>                |                                                       |                         |
| Glucose 6-phosphate              | 25.445 $\pm$ 0.567                                    | 29.021 $\pm$ 0.610*     |
| Fructose 6-phosphate             | 8.591 $\pm$ 0.176                                     | 10.051 $\pm$ 0.273*     |
| Fructose 1,6-diphosphate         | 0.653 $\pm$ 0.067                                     | 0.635 $\pm$ 0.100       |
| Dihydroxyacetone phosphate       | 8.268 $\pm$ 0.338                                     | 11.394 $\pm$ 0.098*     |
| 3-Phosphoglyceric acid           | 70.567 $\pm$ 1.293                                    | 41.054 $\pm$ 0.929*     |
| 2-Phosphoglyceric acid           | 7.956 $\pm$ 0.195                                     | 4.822 $\pm$ 0.134*      |
| Phosphoenolpyruvic acid          | 17.815 $\pm$ 0.337                                    | 10.217 $\pm$ 0.095*     |
| Pyruvic acid                     | 54.875 $\pm$ 1.452                                    | 30.684 $\pm$ 2.973*     |
| Lactic acid                      | 10140.602 $\pm$ 101.363                               | 9024.705 $\pm$ 350.355* |
| Fructose 1-phosphate             | 1.944 $\pm$ 0.776                                     | 1.348 $\pm$ 0.737*      |
| Glycerol 3-phosphate             | 230.470 $\pm$ 6.285                                   | 779.513 $\pm$ 25.265*   |
| 2,3-Diphosphoglyceric acid       | 4.747 $\pm$ 0.057                                     | 0.409 $\pm$ 0.024*      |
| <i>TCA cycle</i>                 |                                                       |                         |
| Acetyl CoA                       | 0.032 $\pm$ 0.013                                     | 0.027 $\pm$ 0.010       |
| CoA                              | 0.412 $\pm$ 0.012                                     | 0.505 $\pm$ 0.028*      |
| Citric acid                      | 3.995 $\pm$ 0.455                                     | N.D.                    |
| $\alpha$ -Ketoglutaric acid      | 12.884 $\pm$ 0.588                                    | 8.084 $\pm$ 1.471*      |
| Succinic acid                    | 62.239 $\pm$ 1.267                                    | 135.582 $\pm$ 4.424*    |
| Fumaric acid                     | 700.874 $\pm$ 9.309                                   | 599.059 $\pm$ 16.568*   |
| Malic acid                       | 2106.790 $\pm$ 28.503                                 | 1795.026 $\pm$ 79.442*  |
| <i>Pentose phosphate pathway</i> |                                                       |                         |
| 6-Phosphogluconic acid           | 50.175 $\pm$ 1.396                                    | 60.930 $\pm$ 1.607*     |
| Ribose 5-phosphate               | 1.061 $\pm$ 0.061                                     | 1.104 $\pm$ 0.122       |
| UDP-glucose                      | 0.781 $\pm$ 0.029                                     | 0.644 $\pm$ 0.051*      |
| ADP-ribose                       | 0.468 $\pm$ 0.021                                     | 0.429 $\pm$ 0.024       |
| Galactose 1-phosphate            | 51.098 $\pm$ 0.153                                    | 46.520 $\pm$ 1.665*     |
| Glucose 1-phosphate              | 2.141 $\pm$ 0.789                                     | 2.238 $\pm$ 1.271       |
| Ribose 1-phosphate               | 20.622 $\pm$ 1.004                                    | 26.839 $\pm$ 0.737*     |

| <i>Glutathione metabolism</i>           |                  |                   |
|-----------------------------------------|------------------|-------------------|
| Glutathione (GSH)                       | 76.586±3.408     | 158.868±5.457*    |
| Glutathione (GSSG)                      | 1633.081±35.013  | 1197.879±26.676*  |
| S-Adenosylhomocysteine                  | 10.261±0.119     | 12.041±0.695      |
| Cystathionine                           | 35.019±1.206     | 27.087±1.050*     |
| Homoserine                              | 3.362±0.726      | 6.506±1.732       |
| Thr                                     | 4798.143±132.978 | 5719.924±160.113* |
| <i>Carnitine and choline metabolism</i> |                  |                   |
| Carnitine                               | 300.006±5.024    | 327.691±1.952*    |
| Choline                                 | 2150.539±113.030 | 2923.430±123.61*  |
| Betaine aldehyde                        | 413.371±8.955    | 475.428±9.235*    |
| Betaine                                 | 764.813±8.778    | 776.519±15.539    |
| Folic acid                              | 0.238±0.022      | 0.197±0.008*      |

<sup>1</sup> Values are the means of three replicates for the peak area relative to the internal standard ± standard deviation (SD). \*,  $P < 0.05$ ; <sup>2</sup> High-fat diet 45%; <sup>4</sup> High-fat diet 45% + cyanidin 3-O-β-D-glucoside.

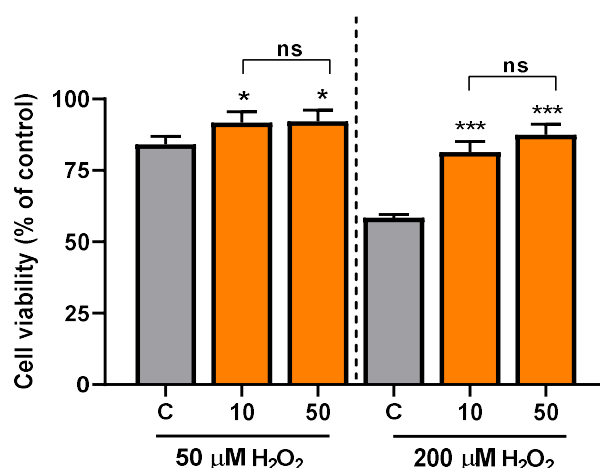

**Figure S1.** C3G modulates ROS and cell signalling in hepatocarcinoma cells. A) Effect of C3G on the viability of HepG2 cells co-treated with 50 and 200  $\mu\text{M}$   $\text{H}_2\text{O}_2$  for 24h. The results represent the mean  $\pm$  SEM ( $n=3$ ). For comparisons between two groups, Student's t-test was performed. \*,  $P < 0.05$ ; \*\*,  $P < 0.01$ ; \*\*\*,  $P < 0.005$  compared with controls. C, control (0.1% DMSO); C3G, Cyanidin 3-glucoside; ns, not statistically significant.

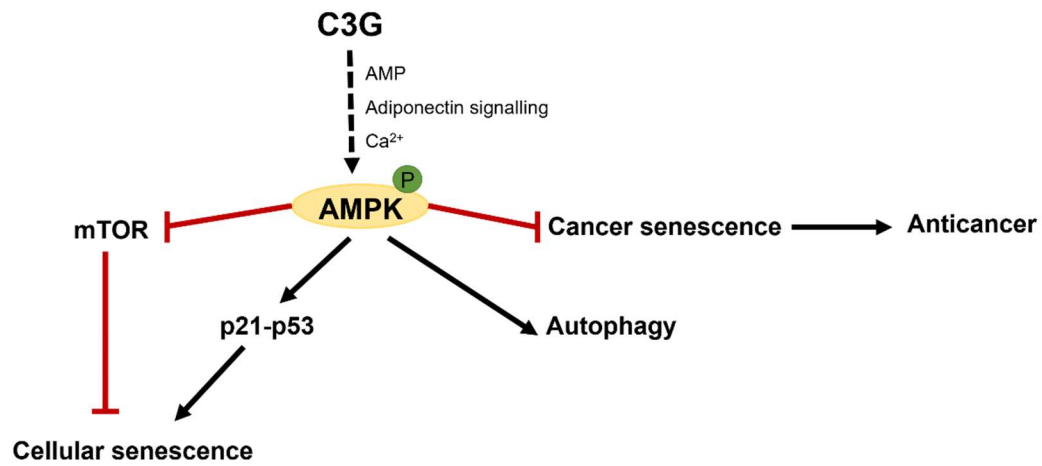

**Figure S2.** Several potential molecular pathways are involved in cellular senescence and C3G presumably regulates cell fate in an AMPK/p53-dependent manner.
